# Supplementary material for: The role of the pulmonary veins on left atrial hemodynamics and thrombus formation
Source: Research Square preprint supplement (doi:10.21203/rs.3.rs-3614736/v1), 2023-11-29
Supplement: Supplementary file 1 [file 950bf901fea93b9352500906.pdf]

## Supplementary Information

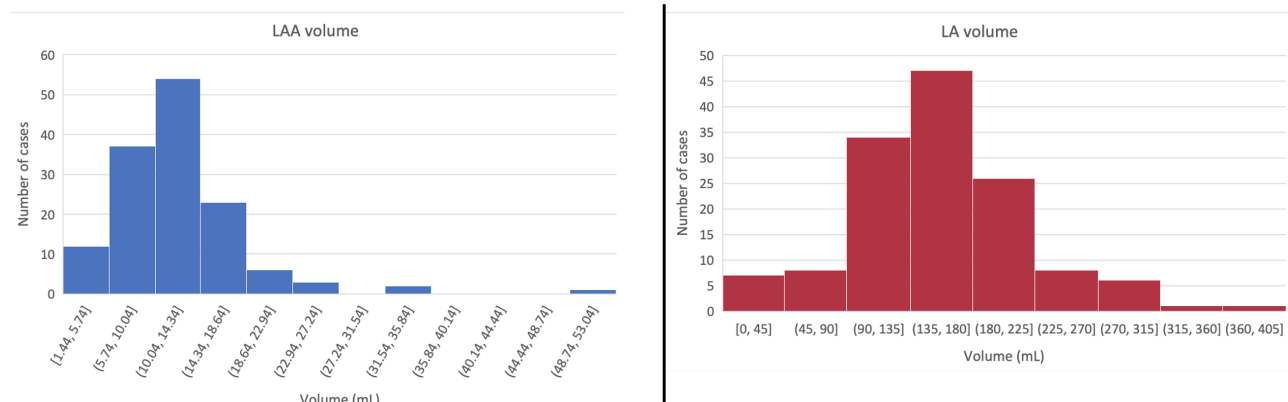

**Additional Figure A1.** Histograms of the left atrial (LA) and left atrial appendage (LAA) volume distribution (in mL)

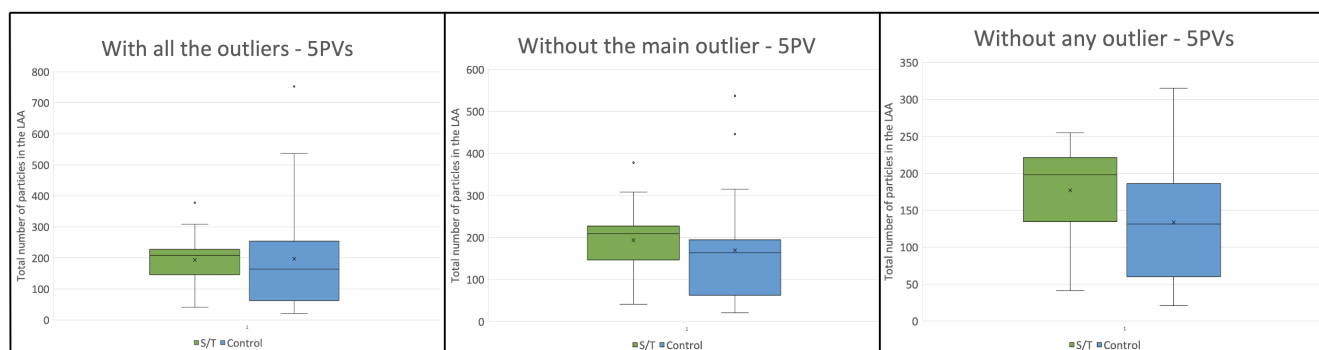

**Additional Figure A2.** On the left, the box plot for the 5PVs group. At the center, the boxplot with the main outlier (T/S group) removed from the cohort. On the right, the boxplot with all the outliers removed. One case within the control group exhibits a count exceeding 700, significantly deviating from the main distribution of the control group. Consequently, the mean number of particles in the LAA is higher in the control group than in the thrombus group. Upon removing this outlier, the mean undergoes a change (193.5 in the thrombus group vs. 169.5 in the control group). However, it is important to exercise caution in avoiding the fallacy of incomplete evidence. The results presented in the main text are derived directly from the simulations without removing any cases.

| Results for 3 pulmonary veins |             |              |
|-------------------------------|-------------|--------------|
| PV origin                     | C (Type NA) | T/S (Type A) |
| LCPV (%)                      | 73.96       | 83.29        |
| RSPV (%)                      | 18.31       | 15.58        |
| RIPV (%)                      | 7.72        | 1.13         |
| Left side (%)                 | 73.96       | 83.29        |
| Right side (%)                | 26.04       | 16.71        |
| # Particles                   | 133.33      | 353.00       |

**Additional Table A1.** The cohort of patients with 3 PV comprised merely three control cases and one case with thrombus formation. Notably, the latter case exhibited a high left superior pulmonary vein (LSPV)-LAA alignment, as evidenced by a small  $\gamma$  angle (type A). Furthermore, the thrombus case presented a higher number of flow particles remaining within the LAA at the end of fluid simulations, in contrast to the control cases. Moreover, an overwhelming majority of flow particles in the LAA were coming from the left pulmonary vein (approximately 80%) in these cases, with comparable flow patterns observed between the control and thrombus groups (refer to supplementary Table ??). However, it is worth noting that the control cases had a higher proportion of flow into the LAA coming from the right inferior pulmonary vein (RIPV) due to their lesser alignment of the ostium of the LAA with the LSPV. Pulmonary vein origin of simulated particles reaching the left atrial appendage in cases with 4 pulmonary vein and Type A alignment. C: control. T/S: thrombus or stroke group. L/R: left/right; S/C/I: superior/central/inferior. #: total number. Larger differences between the two groups are shown in bold.

| Results for 7 pulmonary veins |        |        |
|-------------------------------|--------|--------|
| PV origin                     | C      | T/S    |
| LSPV (%)                      | 44.03  | 25.00  |
| LIPV (%)                      | 18.91  | 32.58  |
| RSPV (%)                      | 11.10  | 16.7   |
| RCPV (%)                      | 7.92   | 9.09   |
| RIPV (%)                      | 11.82  | 4.55   |
| RSCSPV (%)                    | 6.18   | 6.82   |
| RICSPV (%)                    | 7.92   | 5.30   |
| Left side (%)                 | 62.96  | 57.58  |
| Right side (%)                | 37.04  | 42.42  |
| # Particles                   | 156.00 | 132.00 |

**Additional Table A2.** The analysis of 7 pulmonary vein (PV) cases was limited to four cases, including 3 CW LAA morphologies. The non-CW case, which did not have thrombus, had a high LSPV-LAA alignment and a large left side contribution into LAA particles, following the trend described in cases with a lower number of PV. Finally, it was not possible to find consistent trends in the studied parameters for the CW cases. Pulmonary vein origin of simulated particles reaching the left atrial appendage in cases with 4 pulmonary vein and Type A alignment. C: control. T/S: thrombus or stroke group. L/R: left/right; S/C/I: superior/central/inferior. #: total number. Larger differences between the two groups are shown in bold.
